# Supplementary material
Source: PubMed Central journal article supplement (PMC3320975)
Supplement: supp_M111.293613_jbc.M111.293613-1.pdf [file supp_M111.293613_jbc.M111.293613-1.pdf]

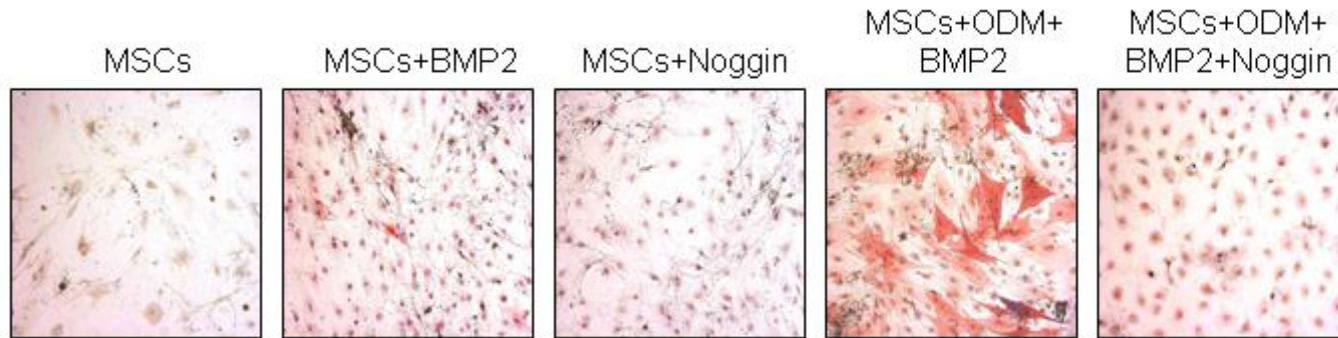

**Supplemental Figure - S1: Noggin inhibits BMP-2 mediated osteoblast differentiation of MSC.**  $10^4$  MSC were cultured in osteoblast differentiation medium (ODM) and BMP-2 in the presence or absence of noggin. After 10 days, presence of osteoblasts were detected by staining for alkaline phosphatase.

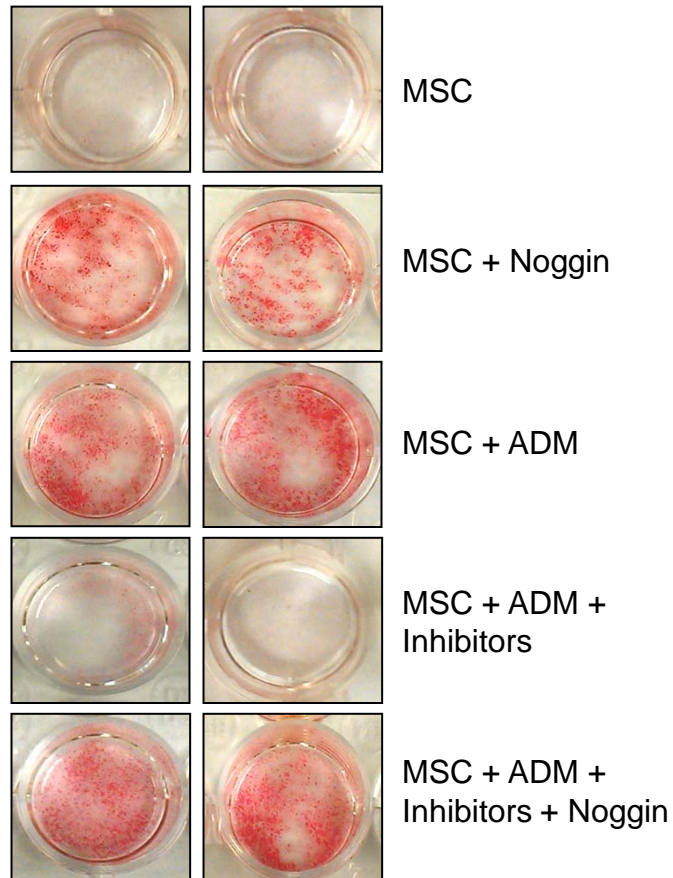

**Supplemental Figure – S2: Noggin induces adipocyte differentiation of MSC.**  $10^4$  MSC were cultured in adipocyte differentiation media (ODM) in the presence or absence of noggin and inhibitors of adipogenesis (LY294002+Rapamycin). After 14 days, presence of adipocytes was detected by oil red o staining as described in Materials and Methods. The experiment was repeated 3 times independently. Representative images for different culture conditions used are shown.

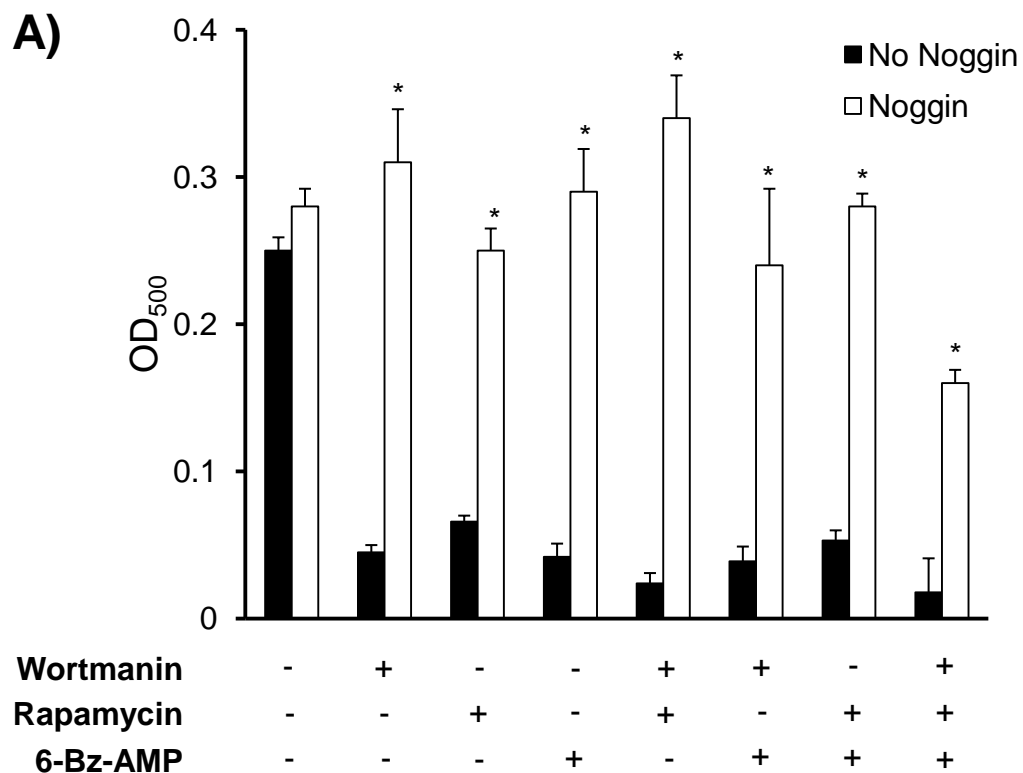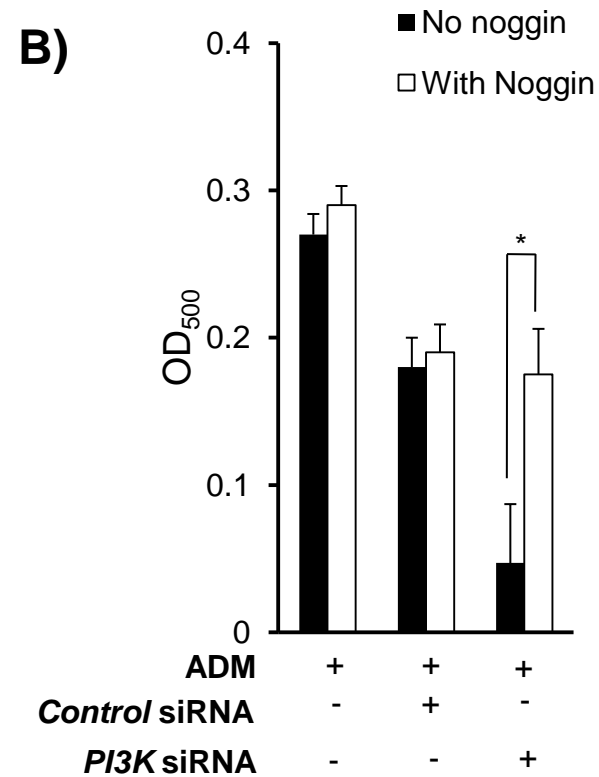

**Supplemental Figure – S3: Noggin induces adipogenesis of MSC in the presence of inhibitors.**

(A) MSC were cultured in the ADM along with various inhibitors, in the presence of absence of noggin, as described in Materials and Methods. To determine the role of Pax-1 in noggin-induced adipogenesis, MSC from obese mice were transfected with *shRNA* construct for Pax-1. Presence of adipocytes was quantified by Oil Red O staining. The experiment was repeated three times independently. \*  $p < 0.05$ . (B) PI3 kinase expression was knocked-down in MSC using a gene specific siRNA. As a control, MSC were transfected with a control siRNA. Transfected MSC were differentiated into adipocytes in the presence or absence of noggin. Presence of adipocytes was quantified by Oil Red O staining. The experiment was repeated three times independently. \*  $p < 0.05$ .

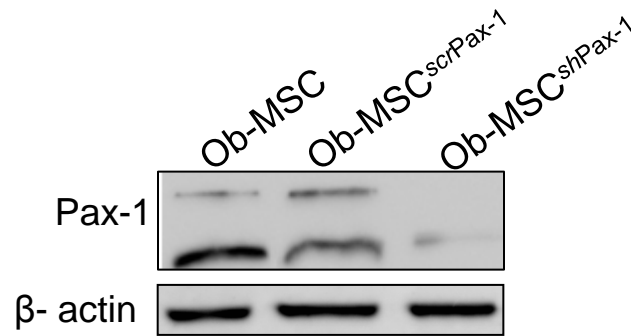

**Supplemental Figure – S4: Knock-down of Pax-1 in MSC from obese mice.** To determine the role of Pax-1 in noggin induced adipogenesis, MSC from obese mice were transfected with *shRNA* construct for Pax-1 as mentioned in Materials and Methods. As a control, obese MSC were transfected with a *scrRNA* control. Transfected cells were selected with 2  $\mu\text{g/ml}$  puromycin. Knock-down of Pax-1 was confirmed by western blot analysis using cell lysates.

**A)**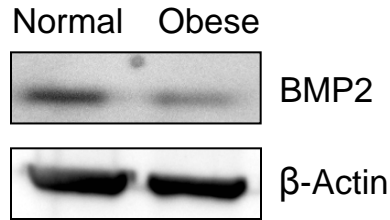**B)**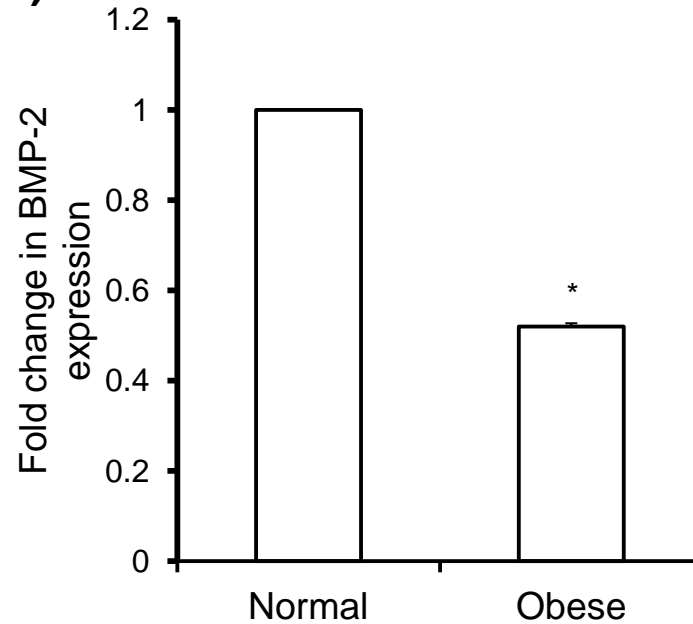

**Supplemental Figure – S5: BMP-2 expression is significantly lowered in obese MSC compared to normal MSC.** (A) BMP-2 expression in the whole cell lysates of normal and obese MSC was determined by western blot analysis using murine anti- BMP2 antibody (R&D Biosystems). A representative blot is shown here. Data clearly shows that BMP-2 levels are considerably reduced in the obese MSC compared to the normal MSC. (B) Densitometry analysis of the western blot is shown to indicate change in BMP-2 expression in obese MSC compared to the normal MSC[N=3, \*  $p < 0.0001$ ].
